# Supplementary material
Source: Springer Nature journal article supplement (https://www.springermedizin.de/resource/supplementary/12903_2014_401_MOESM1_ESM.pdf/9516964)

**Figure 1 Study allocation**

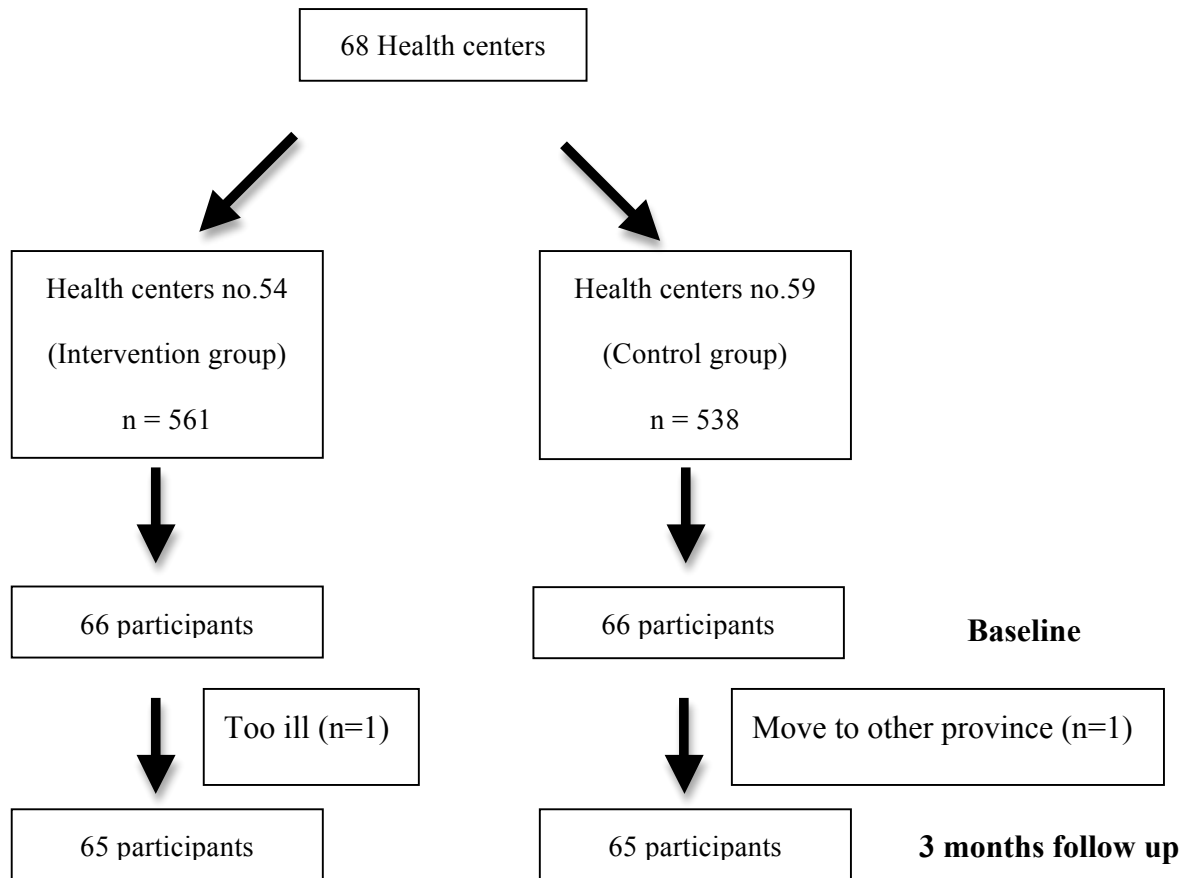

Supplement: MOESM1 [file 9516964]
